# Supplementary material for: Safer Return to Play After Anterior Cruciate Ligament Reconstruction: Evaluation of a Return-to-Play Checklist
Source: PubMed Central journal article supplement — Orthop J Sports Med. 2022 Apr 18;10(4):23259671221090412. doi: 10.1177/23259671221090412 (PMC9019333; doi:10.1177/23259671221090412), 2022-04-18
Supplement: sj-pdf-1-ojs-10.1177_23259671221090412.pdf [file sj-pdf-1-ojs-10.1177_23259671221090412.pdf]

## **Supplemental Material 1: Systematic Review**

### ***Identification of Studies for Inclusion in the Systematic Review***

We performed a literature search of English language clinical trials and systematic reviews using PubMed from January 1994 through December 2014. Search criteria included the terms: “ACL reconstruction rehabilitation,” “ACL reconstruction and rehabilitation,” “ACL injury and rehabilitation” and “ACL reconstruction.” All references from selected studies were reviewed to identify any additional papers that may have been overlooked or were not indexed in the electronic databases. Studies that included individuals with multi-ligament knee tears, knee dislocations, or those undergoing ACL revision were excluded from our review.

### ***Data Extraction***

Data were collected according to a predetermined form. Information collected for each study included reconstruction technique, graft choice, objective outcome assessment tool and any stated threshold for RTP. Measures identified included, but were not limited to, duration of recovery, absence of effusion, absence of pain, absence of “giving away,” questionnaires, range of motion (ROM), muscle strength similarity including isokinetic device measurement (Cybex, Biodex, Kintrex, Kincom), hop tests, thigh circumference, KT-1000, proprioception tests or other sport-specific agility and functional testing. Information was organized by study and objective outcome measure in order to draw conclusions about the types of tools currently employed to assess RTP after ACLR.

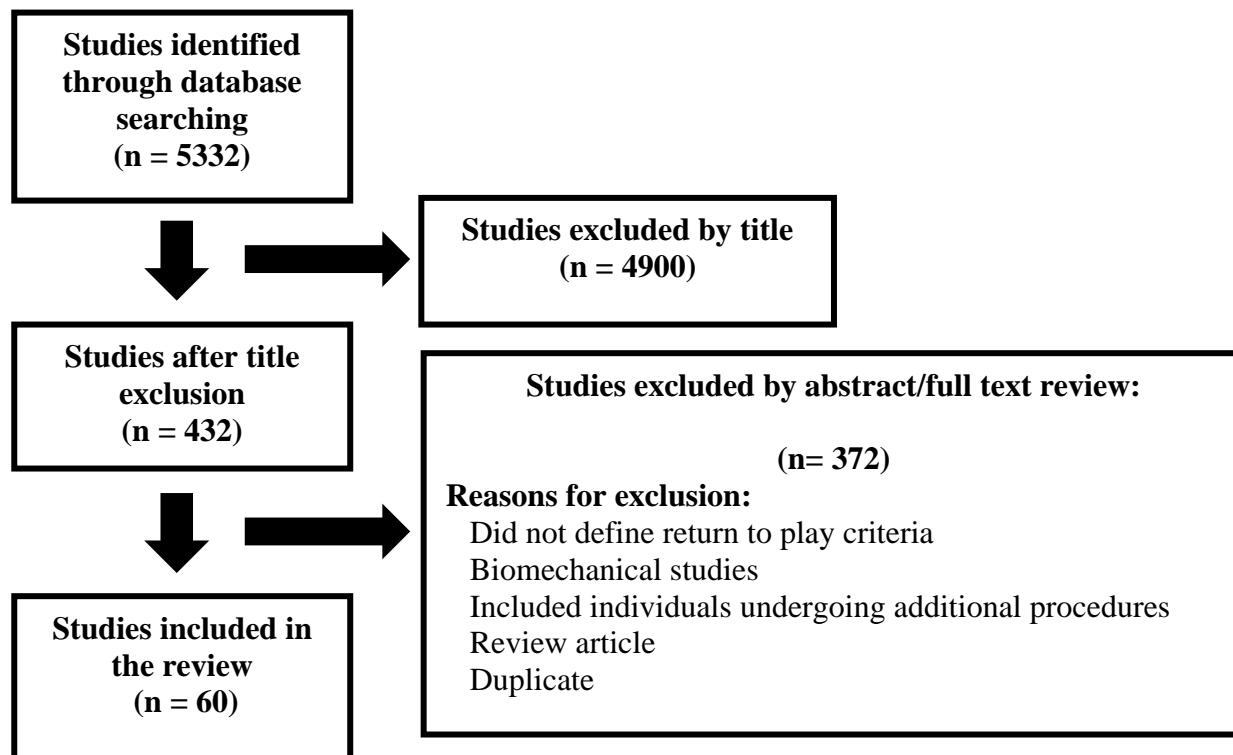

PRISMA (Preferred Reporting Items for Systematic Reviews and Meta-Analyses) chart outlining the review of articles from the search

Studies included in the systematic review

| Author                        | Year | Title                                                                                                                                                                                             | n   | Measures                                            |
|-------------------------------|------|---------------------------------------------------------------------------------------------------------------------------------------------------------------------------------------------------|-----|-----------------------------------------------------|
| Akoto et al. <sup>1</sup>     | 2012 | Anterior cruciate ligament (ACL) reconstruction with quadriceps tendon autograft and press-fit fixation using an anteromedial portal technique                                                    | 30  | IsoK*                                               |
| Anderson et al <sup>2</sup>   | 1994 | Anterior cruciate ligament reconstruction using the semitendinosus and gracilis tendons augmented by the loose iliotibial band tenodesis                                                          | 70  | IsoK*                                               |
| Ardern et al. <sup>4</sup>    | 2013 | Psychological Response Matter in Returning to Preinjury Level of Sport After Anterior Cruciate Ligament Reconstruction Surgery                                                                    | 187 | PE†, Fx‡                                            |
| Aune et al <sup>6</sup>       | 2001 | Four-Strand Hamstring Tendon Autograft Compared with Patellar Tendon-Bone Autograft for Anterior Cruciate Ligament Reconstruction                                                                 | 72  | PE†, Fx‡                                            |
| Barrett et al <sup>9</sup>    | 2010 | Allograft Anterior Cruciate Ligament Reconstruction in the Young Active Patient: Tegner Activity Level and Failure Rate                                                                           | 111 | PE†, Hop (SLHD <sup>a</sup> ), Fx‡, TC <sup>b</sup> |
| Beynon et al <sup>11</sup>    | 2002 | Anterior cruciate ligament replacement: comparison of bone-patellar tendon-bone grafts with two-strand hamstring grafts.                                                                          | 56  | PE†, IsoK*                                          |
| Colombet et al <sup>15</sup>  | 2006 | Two-bundle, four-tunnel anterior cruciate ligament reconstruction                                                                                                                                 | 33  | IsoK*                                               |
| Drogset et al. <sup>21</sup>  | 2002 | Anterior cruciate ligament reconstruction with and without a ligament augmentation device                                                                                                         | 115 | IsoK*, Fx‡                                          |
| Drogset et al <sup>22</sup>   | 2006 | Comparison of In Vitro and In Vivo Complement Activation by Metal and Bioabsorbable Screws Used in Anterior Cruciate Ligament Reconstruction                                                      | 41  | IsoK*, Fx‡                                          |
| Drogset et al <sup>23</sup>   | 2006 | Magnetic Resonance Imaging Analysis of Bioabsorbable Interference Screws Used for Fixation of Bone–Patellar Tendon–Bone Autografts in Endoscopic Reconstruction of the Anterior Cruciate Ligament | 19  | IsoK*, Fx‡                                          |
| Drogset et al <sup>24</sup>   | 2005 | Endoscopic Reconstruction of the Anterior Cruciate Ligament Using Bone–Patellar Tendon–Bone Grafts Fixed With Bioabsorbable or Metal Interference Screws                                          | 41  | IsoK*, Fx‡                                          |
| Drogset et al <sup>25</sup>   | 2010 | Autologous patellar tendon and quadrupled hamstring grafts in anterior cruciate ligament reconstruction: a prospective randomized multicenter review of different fixation methods                | 100 | IsoK*, Fx‡                                          |
| Eriksson et al <sup>26</sup>  | 2001 | There are differences in early morbidity after ACL reconstruction when comparing patellar tendon and semitendinosus graft                                                                         | 107 | Hop (SLHD <sup>a</sup> )                            |
| Giannotti et al <sup>27</sup> | 1996 | The Predictive Value of Intraoperative KT-1000 Arthrometer Measurements in Single Incision Anterior Cruciate Ligament Reconstruction                                                              | 28  | PE†, Hop (SLHD <sup>a</sup> )                       |
| Goradia et al <sup>29</sup>   | 2006 | Factors Associated With Decreased Muscle Strength After Anterior Cruciate Ligament Reconstruction With Hamstring Tendon Grafts                                                                    | 85  | IsoK*                                               |

| Author                          | Year | Title                                                                                                                                                                       | n   | Measures                                                                                |
|---------------------------------|------|-----------------------------------------------------------------------------------------------------------------------------------------------------------------------------|-----|-----------------------------------------------------------------------------------------|
| Grindem et al. <sup>30</sup>    | 2012 | A Pair-Matched Comparison of Return to Pivoting Sports at 1 Year in Anterior Cruciate Ligament–Injured Patients After a Nonoperative Versus an Operative Treatment Course   | 138 | IsoK*, Hop (SLHD <sup>a</sup> , SLTH <sup>b</sup> , TH <sup>c</sup> , Cr <sup>d</sup> ) |
| Hartigan et al. <sup>31</sup>   | 2010 | Time line for noncopers to pass return-to-sports criteria after anterior cruciate ligament reconstruction                                                                   | 49  | Survey, IsoK*, Hop (SLHDA, SLTH <sup>b</sup> , TH <sup>c</sup> , Cr <sup>d</sup> )      |
| Henriksson et al. <sup>32</sup> | 2002 | Range of motion training in brace vs. plaster immobilization after anterior cruciate ligament reconstruction: a prospective randomized comparison with a 2-year follow-up.  | 50  | IsoK*, Fx‡?                                                                             |
| Higuchi et al. <sup>36</sup>    | 2003 | The relation between static and dynamic knee stability after ACL reconstruction                                                                                             | 49  | PE†, IsoK*                                                                              |
| Higuchi et al. <sup>37</sup>    | 2002 | Characteristics of anterior tibial translation with active and isokinetic knee extension exercise before and after ACL reconstruction                                       | 49  | PE†, IsoK*                                                                              |
| Isberg et al. <sup>40</sup>     | 2011 | Will early reconstruction prevent abnormal kinematics after ACL injury? Two-year follow-up using dynamic radiostereometry in 14 patients operated with hamstring autografts | 14  | IsoK*                                                                                   |
| Isberg et al. <sup>39</sup>     | 2006 | Early active extension after anterior cruciate ligament reconstruction does not result in increased laxity of the knee                                                      | 22  | IsoK*                                                                                   |
| Jenkins et al. <sup>41</sup>    | 1998 | Knee Joint Accessory Motion Following Anterior Cruciate Ligament Allograft Reconstruction: A Preliminary Report                                                             | 5   | PE†, Fx‡, Arth <sup>f</sup>                                                             |
| Jorgensen et al. <sup>42</sup>  | 2000 | Behavior of the graft within the bone tunnels following anterior cruciate ligament reconstruction, studied by cinematic magnetic resonance imaging                          | 23  | PE†, IsoK*                                                                              |
| Kamien et al. <sup>43</sup>     | 2013 | Age, Graft Size, and Tegner Activity Level as Predictors of Failure in Anterior Cruciate Ligament Reconstruction With Hamstring Autograft                                   | 98  | Fx‡, TC <sup>g</sup>                                                                    |
| Keays et al. <sup>44</sup>      | 2003 | The relationship between knee strength and functional stability before and after anterior cruciate ligament reconstruction                                                  | 31  | IsoK*, Hop (SLHD <sup>a</sup> , TH <sup>c</sup> )                                       |
| Kobayashi et al. <sup>47</sup>  | 2003 | Muscle performance after anterior cruciate ligament reconstruction                                                                                                          | 36  | PE†, IsoK*                                                                              |
| Landes et al. <sup>49</sup>     | 2010 | Knee flexor strength after ACL reconstruction: comparison between hamstring autograft, tibialis anterior allograft, and non-injured controls                                | 60  | IsoK*, Hop (SLHD <sup>a</sup> )                                                         |
| Larkin et al. <sup>50</sup>     | 1998 | The effect of injury chronicity and progressive rehabilitation on single-incision arthroscopic anterior cruciate ligament reconstruction                                    | 42  | IsoK*                                                                                   |
| Lee et al. <sup>52</sup>        | 2004 | Outcome of Anterior Cruciate Ligament Reconstruction Quadriceps Tendon Autograft                                                                                            | 67  | IsoK*                                                                                   |

| Author                           | Year | Title                                                                                                                                                                                    | n   | Measures                                               |
|----------------------------------|------|------------------------------------------------------------------------------------------------------------------------------------------------------------------------------------------|-----|--------------------------------------------------------|
| Lee et al <sup>51</sup>          | 2010 | Comparison of Clinical Results and Second-Look Arthroscopy Findings After Arthroscopic Anterior Cruciate Ligament Reconstruction Using 3 Different Types of Grafts                       | 338 | IsoK*                                                  |
| Lentz et al. <sup>53</sup>       | 2012 | Return to Preinjury Sports Participation Following Anterior Cruciate Ligament Reconstruction: Contributions of Demographics, Knee Impairment and Self-report Measures                    | 94  | PE†, IsoK*, Fx‡                                        |
| MacDonald et al. <sup>55</sup>   | 1995 | Effects of an Accelerated Rehabilitation Program after Anterior Cruciate Ligament Reconstruction with Combined Semitendinosus-Gracilis Autograft and a Ligament Augmentation Device      | 40  | PE†, IsoK*                                             |
| Marcacci et al <sup>58</sup>     | 2009 | Anterior Cruciate Ligament Reconstruction Associated With Extra-articular Tenodesis                                                                                                      | 54  | Hop (SLHD <sup>a</sup> ), TC <sup>b</sup>              |
| Mascarenhas et al. <sup>59</sup> | 2010 | Patellar Tendon Anterior Cruciate Ligament Reconstruction in the High-Demand Patient: Evaluation of Autograft Versus Allograft Reconstruction                                            | 38  | PE†, IsoK*, Hop (SLHD <sup>a</sup> , VH <sup>e</sup> ) |
| Mascarenhas et al. <sup>60</sup> | 2012 | Bone-patellar tendon-bone autograft versus hamstring autograft anterior cruciate ligament reconstruction in the young athlete: a retrospective matched analysis with 2–10 year follow-up | 46  | PE†, IsoK*, Hop(SLHD <sup>a</sup> , VH <sup>e</sup> )  |
| McHugh et al <sup>62</sup>       | 2002 | Electromyographic predictors of residual quadriceps muscle weakness after anterior cruciate ligament reconstruction                                                                      | 37  | IsoK*                                                  |
| Moller et al <sup>63</sup>       | 2001 | Bracing versus nonbracing in rehabilitation after anterior cruciate ligament reconstruction: a randomized prospective study with 2-year follow-up                                        | 62  | IsoK*, Hop (SLHD <sup>a</sup> )                        |
| Muneta et al <sup>64</sup>       | 1999 | Two-bundle reconstruction of the anterior cruciate ligament using semitendinosus tendon with endobuttons: operative technique and preliminary results                                    | 54  | IsoK*                                                  |
| Noyes et. al. <sup>68</sup>      | 1997 | Anterior cruciate ligament reconstruction with autogenous patellar tendon graft in patients with articular cartilage damage                                                              | 53  | PE†, IsoK*                                             |
| Noyes et al. <sup>69</sup>       | 1997 | A comparison of results of arthroscopic-assisted anterior cruciate ligament reconstruction between workers' compensation and noncompensation patients                                    | 38  | PE†, IsoK*                                             |
| Noyes et al. <sup>67</sup>       | 1996 | Reconstruction of the anterior cruciate ligament with human allograft. Comparison of early and later results                                                                             | 68  | IsoK*                                                  |
| Poehling et al. <sup>74</sup>    | 2005 | Analysis of outcomes of anterior cruciate ligament repair with 5-year follow-up: allograft versus autograft                                                                              | 159 | IsoK*. Fx‡                                             |
| Sajovic et al. <sup>77</sup>     | 2006 | A Prospective, Randomized Comparison of Semitendinosus and Gracilis Tendon Versus Patellar Tendon Autografts for Anterior Cruciate Ligament Reconstruction                               | 64  | PE†, IsoK*                                             |
| Siebold et al. <sup>84</sup>     | 2006 | Anterior cruciate ligament reconstruction in females: a comparison of hamstring tendon and patellar tendon autografts                                                                    | 65  | PE†, IsoK*                                             |

| Author                           | Year | Title                                                                                                                                                                             | n    | Measures                                                                     |
|----------------------------------|------|-----------------------------------------------------------------------------------------------------------------------------------------------------------------------------------|------|------------------------------------------------------------------------------|
| Shelbourne et al. <sup>82</sup>  | 1995 | Ligament Stability Two to Six Years After Anterior Cruciate Ligament Reconstruction with Autogenous Patellar Tendon Graft and Participation in Accelerated Rehabilitation Program | 209  | IsoK*                                                                        |
| Shelbourne et al. <sup>81</sup>  | 1995 | Timing of Surgery in Acute Anterior Cruciate Ligament Tears on the Return of Quadriceps Muscle Strength After Reconstruction Using an Autogenous Patellar Tendon Graft            | 143  | IsoK*                                                                        |
| Shelbourne et al. <sup>83</sup>  | 1997 | Anterior Cruciate Ligament Reconstruction with Autogenous Patellar Tendon Graft Followed by Accelerated Rehabilitation                                                            | 1057 | IsoK*                                                                        |
| Shelbourne et al. <sup>80</sup>  | 2014 | Return to Sports and Subsequent Injury Rates After Revision Anterior Cruciate Ligament Reconstruction With Patellar Tendon Autograft                                              | 84   | IsoK*                                                                        |
| Sterling et al. <sup>87</sup>    | 1995 | Allograft Failure in Cruciate Ligament Reconstruction                                                                                                                             | 18   | IsoK*                                                                        |
| Smith et al. <sup>85</sup>       | 2008 | High Failure Rate for Electrothermal Shrinkage of the Lax Anterior Cruciate Ligament: A Multicenter Follow-up Past 2 Years                                                        | 64   | PE†, IsoK*                                                                   |
| Tashiro et al. <sup>89</sup>     | 2003 | Influence of medial hamstring tendon harvest on knee flexor strength after anterior cruciate ligament reconstruction                                                              | 90   | IsoK*                                                                        |
| Timm et al. <sup>90</sup>        | 1997 | The clinical and cost-effectiveness of two different programs for rehabilitation following ACL reconstruction                                                                     | 60   | IsoK*, Arth <sup>f</sup> , Hop (SLHD <sup>a</sup> , SLTH <sup>b</sup> , VHe) |
| Wagner et al. <sup>92</sup>      | 2005 | Hamstring Tendon Versus Patellar Tendon Anterior Cruciate Ligament Reconstruction Using Biodegradable Interference Fit Fixation                                                   | 356  | PE†, Hop (SLHD <sup>a</sup> )                                                |
| Weiler et al. <sup>94</sup>      | 2007 | Primary Versus Single-Stage Revision Anterior Cruciate Ligament Reconstruction Using Autologous Hamstring Tendon Grafts A Prospective Matched-Group Analysis                      | 351  | PE†, IsoK*                                                                   |
| Yoon et al. <sup>96</sup>        | 2009 | Standard anterior cruciate ligament reconstruction versus isolated single-bundle augmentation with hamstring autograft                                                            | 164  | IsoK*                                                                        |
| Zaffagnini et al. <sup>100</sup> | 2006 | Prospective and randomized evaluation of ACL reconstruction with three techniques: a clinical and radiographic evaluation at 5 years follow-up                                    | 75   | TC <sup>g</sup> , Hop (SLHD <sup>a</sup> )                                   |
| Zaffagnini et al. <sup>99</sup>  | 2008 | ST/G ACL reconstruction: double strand plus extra-articular sling vs double bundle, randomized study at 3-year follow-up                                                          | 72   | PE†, IsoK*                                                                   |
| Zaffagnini et al. <sup>98</sup>  | 2011 | Single-bundle patellar tendon versus non-anatomical double-bundle hamstrings ACL reconstruction: a prospective randomized study at 8-year minimum follow-up                       | 79   | PE†, IsoK*, Hop (SLHD <sup>a</sup> ), TC <sup>g</sup>                        |
| Zaffagnini et al. <sup>97</sup>  | 2013 | The Videoinight method: improving rehabilitation following anterior cruciate ligament reconstruction - a preliminary study                                                        | 106  | PE†, IsoK*, Hop (SLHD <sup>a</sup> ), TC <sup>g</sup>                        |
